# Supplementary material for: Impact of Final Phase Social Isolation and the COVID-19 Pandemic on Eating Behavior, Sleep Quality, and Anxiety Level
Source: MDPI journal article supplement (doi:10.3390/nu15092148), 2023-04-29
Supplement: s1 [file s1]

## SUPPLEMENTARY MATERIAL

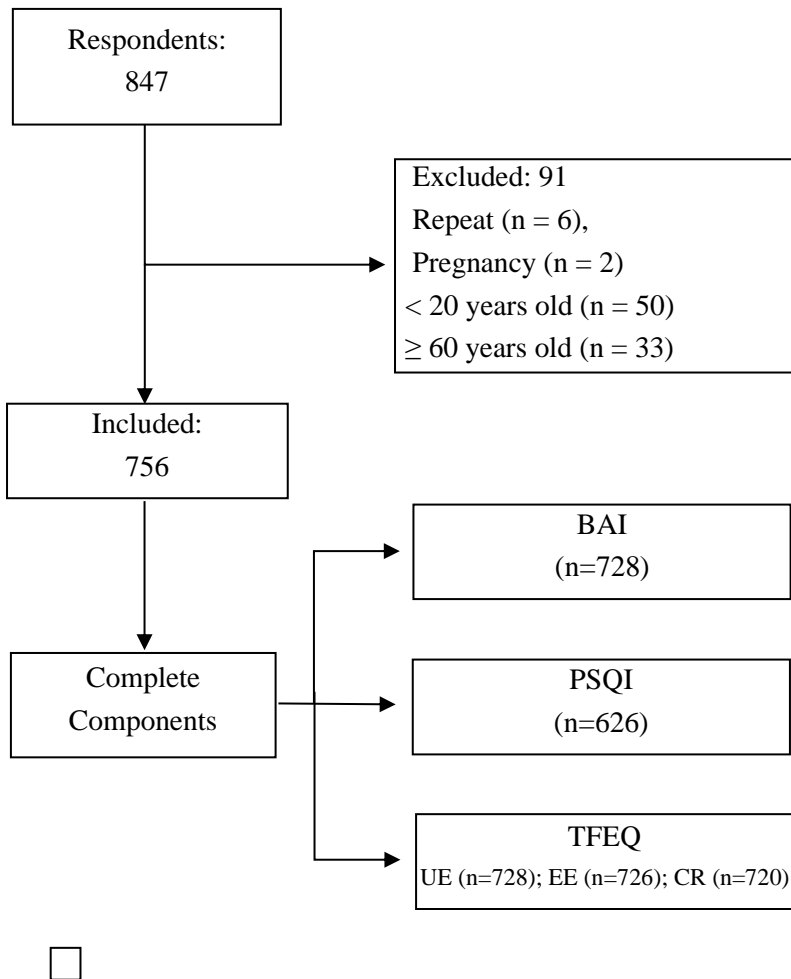

**Figure S1. Flowchart of participants selected for the study.**

BAI, Beck Anxiety Scale; PSQI, *Pittsburgh Sleep Quality Index*; TFEQ-21, *Three-Factor Eating Questionnaire*; UE, uncontrolled eating; EE, emotional eating; CR, cognitive restriction.

**Table S1.** Characterization of the participants (n=756)

|                          |                            | COVID |       |     |       |     |       |            |      |
|--------------------------|----------------------------|-------|-------|-----|-------|-----|-------|------------|------|
|                          |                            | Total |       | No  |       | Yes |       | Don't know |      |
|                          |                            | n     | %     | n   | %     | n   | %     | n          | %    |
| Region (617)             | Midwest                    | 305   | 49,4% | 166 | 26,9% | 129 | 20,9% | 10         | 1,6% |
|                          | North                      | 9     | 1,5%  | 2   | 0,3%  | 5   | 0,8%  | 2          | 0,3% |
|                          | Northeast                  | 45    | 7,3%  | 28  | 4,5%  | 15  | 2,4%  | 2          | 0,3% |
|                          | Southeast                  | 215   | 34,8% | 118 | 19,1% | 86  | 13,9% | 11         | 1,8% |
|                          | South                      | 43    | 7,0%  | 19  | 3,1%  | 24  | 3,9%  | 0          | 0,0% |
| Sex (756)                | Male                       | 138   | 18,3% | 86  | 11,4% | 47  | 6,2%  | 5          | 0,7% |
|                          | Female                     | 618   | 81,7% | 339 | 44,8% | 256 | 33,9% | 23         | 3,0% |
| Level of Education (755) | Fundamental                | 6     | 0,8%  | 4   | 0,5%  | 2   | 0,3%  | 0          | 0,0% |
|                          | Medium                     | 279   | 37,0% | 146 | 19,3% | 121 | 16,0% | 12         | 1,6% |
|                          | Superior                   | 450   | 59,6% | 262 | 34,7% | 174 | 23,0% | 14         | 1,9% |
|                          | Other                      | 20    | 2,6%  | 12  | 1,6%  | 6   | 0,8%  | 2          | 0,3% |
| Currently Working (756)  | No                         | 266   | 35,2% | 143 | 18,9% | 111 | 14,7% | 12         | 1,6% |
|                          | Yes                        | 478   | 63,2% | 278 | 36,8% | 185 | 24,5% | 15         | 2,0% |
|                          | Do not wantto answer       | 12    | 1,6%  | 4   | 0,5%  | 7   | 0,9%  | 1          | 0,1% |
|                          |                            |       |       |     |       |     |       |            |      |
| Family income (751)      | Less than 1 MW             | 11    | 1,5%  | 6   | 0,8%  | 3   | 0,4%  | 2          | 0,3% |
|                          | 1MW                        | 17    | 2,3%  | 7   | 0,9%  | 8   | 1,1%  | 2          | 0,3% |
|                          | From 2 to 4 MW             | 218   | 29,0% | 107 | 14,2% | 97  | 12,9% | 14         | 1,9% |
|                          | From 5 to 7 MW             | 166   | 22,1% | 107 | 14,2% | 54  | 7,2%  | 5          | 0,7% |
|                          | More than 8 MW             | 287   | 38,2% | 170 | 22,6% | 114 | 15,2% | 3          | 0,4% |
|                          | Do not wantto answer/other | 52    | 6,9%  | 27  | 3,6%  | 23  | 3,1%  | 2          | 0,3% |

Data are expressed as absolute numbers (n) and percentage frequencies (%). *Abbreviations:* MW: minimum wage.

**Table S2. Effect of taste and smell dysfunctions on anthropometric data, eating behavior, anxiety level, and sleep quality in adult individuals residing in Brazil.**

| Variables           | GCOV with taste dysfunctions |     | GCOV Asymptomatic |     |      |       |
|---------------------|------------------------------|-----|-------------------|-----|------|-------|
|                     | Mean (SE)                    | n   | Mean (SE)         | n   | f    | p     |
| Pre-pandemic weight | 66.97 (1.37)                 | 130 | 67.16 (1.55)      | 101 | 0.01 | 0.926 |
| BMI pre-pandemic    | 24.57 (0.45)                 | 130 | 24.62 (0.52)      | 101 | 0.01 | 0.946 |
| Current weight      | 67.87 (1.33)                 | 130 | 67.49 (1.52)      | 101 | 0.03 | 0.854 |
| Current BMI         | 24.88 (0.43)                 | 130 | 24.74 (0.49)      | 101 | 0.04 | 0.841 |
| Weight variation    | 0.91 (0.76)                  | 130 | 0.33 (0.87)       | 101 | 0.24 | 0.624 |
| UE                  | 36.64 (1.79)                 | 130 | 31.61 (2.05)      | 101 | 3.27 | 0.072 |
| EE                  | 42.53 (2.46)                 | 130 | 36.99 (2.81)      | 101 | 2.93 | 0.088 |
| CR                  | 42.82 (2.07)                 | 130 | 48.71 (2.37)      | 100 | 3.37 | 0.068 |
| BAI                 | 11.94 (0.93)                 | 130 | 12.78 (1.06)      | 101 | 0.35 | 0.558 |
| PSQI                | 6.73 (0.35)                  | 106 | 7.15 (0.39)       | 85  | 0.64 | 0.425 |
| C1                  | 1.13 (0.08)                  | 106 | 1.25 (0.09)       | 85  | 0.95 | 0.332 |
| C2                  | 1.40 (0.09)                  | 106 | 1.50 (0.11)       | 85  | 0.39 | 0.535 |
| C3                  | 0.71 (0.07)                  | 106 | 0.91 (0.08)       | 85  | 3.64 | 0.058 |
| C4                  | 0.47 (0.09)                  | 106 | 0.54 (0.09)       | 85  | 0.28 | 0.599 |
| C5                  | 1.23 (0.05)                  | 106 | 1.16 (0.06)       | 85  | 0.90 | 0.343 |
| C6                  | 0.35 (0.08)                  | 106 | 0.37 (0.09)       | 85  | 0.02 | 0.886 |
| C7                  | 1.43 (0.08)                  | 106 | 1.44 (0.09)       | 85  | 0.03 | 0.955 |
| IN < 5              | 6.90*                        | 10  | 13.90*            | 16  | -    | 0.050 |
| IN > 5              | 93.10*                       | 134 | 86.10*            | 99  | -    | 0.050 |
| UP < 5              | 79.90*                       | 115 | 81.70*            | 94  | -    | 0.414 |
| UP > 5              | 20.10*                       | 29  | 18.30*            | 21  | -    | 0.414 |

| Variables           | GCOV with smell disfunction |     | GCOV Asymptomatic |    |       |       |
|---------------------|-----------------------------|-----|-------------------|----|-------|-------|
|                     | Mean (SE)                   | N   | Mean (SE)         | n  | f     | P     |
| Pre-pandemic weight | 67.23 (1.35)                | 134 | 66.81 (1.61)      | 97 | 0.04  | 0.845 |
| BMI pre-pandemic    | 24.65 (0.45)                | 134 | 24.51 (0.53)      | 97 | 0.035 | 0.851 |
| Current weight      | 67.52 (1.32)                | 134 | 67.95 (1.56)      | 97 | 0.04  | 0.839 |
| Current BMI         | 24.72 (0.43)                | 134 | 24.96 (0.50)      | 97 | 0.13  | 0.724 |
| Weight variation    | 0.30 (0.75)                 | 134 | 1.15 (0.89)       | 97 | 0.50  | 0.479 |
| UE                  | 34.98 (1.79)                | 134 | 33.69 (2.12)      | 97 | 0.21  | 0.651 |
| EE                  | 42.25 (2.45)                | 134 | 38.48 (2.91)      | 97 | 0.93  | 0.337 |
| CR                  | 43.89 (2.06)                | 134 | 47.45 (2.46)      | 96 | 1.16  | 0.283 |
| BAI                 | 11.52 (0.92)                | 134 | 13.39 (1.09)      | 97 | 1.63  | 0.203 |
| PSQI                | 6.93 (0.35)                 | 110 | 6.90 (0.41)       | 85 | 0.001 | 0.970 |
| C1                  | 1.11 (0.08)                 | 110 | 1.28 (0.09)       | 85 | 0.18  | 0.186 |
| C2                  | 1.47 (0.09)                 | 110 | 1.41 (0.11)       | 85 | 0.15  | 0.702 |
| C3                  | 0.73 (0.07)                 | 110 | 0.89 (0.08)       | 85 | 2.05  | 0.153 |
| C4                  | 0.49 (0.09)                 | 110 | 0.51 (0.10)       | 85 | 0.02  | 0.884 |
| C5                  | 1.24 (0.05)                 | 110 | 1.14 (0.06)       | 85 | 1.238 | 0.267 |
| C6                  | 0.44 (0.08)                 | 110 | 0.25 (0.09)       | 85 | 2.065 | 0.152 |
| C7                  | 1.45 (0.08)                 | 110 | 1.42 (0.09)       | 85 | 0.03  | 0.861 |
| IN < 5              | 3.10*                       | 8   | 6.90*             | 18 | -     | 0.005 |
| IN > 5              | 53.30*                      | 138 | 36.7*             | 96 | -     | 0.005 |
| UP < 5              | 82.20*                      | 120 | 78.70*            | 89 | -     | 0.295 |
| UP > 5              | 17.80*                      | 26  | 21.20*            | 24 | -     | 0.295 |

Data are presented as mean  $\pm$  standard error, adjusted for age and sex. Statistical analysis: ANCOVA, covariate = diabetes mellitus, arterial hypertension, time of onset of symptoms of Covid-19, age and sex;

\*Data presented as percentage frequency; Statistical analysis: chi-square test. Confidence interval: 95%, level of significance:  $P < 0.05$ . *Abbreviations:* SE, standard error; n, absolute number; GNCV: group not infected with COVID-19; GCOV: group infected with Covid-19; BMI: body mass index; UE: uncontrolled eating; CR: cognitive restriction; EE: emotional eating; BAI: score referring to Beck's anxiety scale; PSQI: score referring to *Pittsburgh Sleep Quality Index*; C1: subjective sleep quality component; C2: latency component; C3: duration component; C4: efficiency component; C5: sleep disorders component; C6: sleep medication use component; C7: daytime dysfunction component; IN: *in natura*, UP: ultra-processed.
